# Supplementary material
Source: PubMed Central journal article supplement (PMC10160760)
Supplement: mmc2.pdf [file mmc2.pdf]

# Supplemental Figure S2

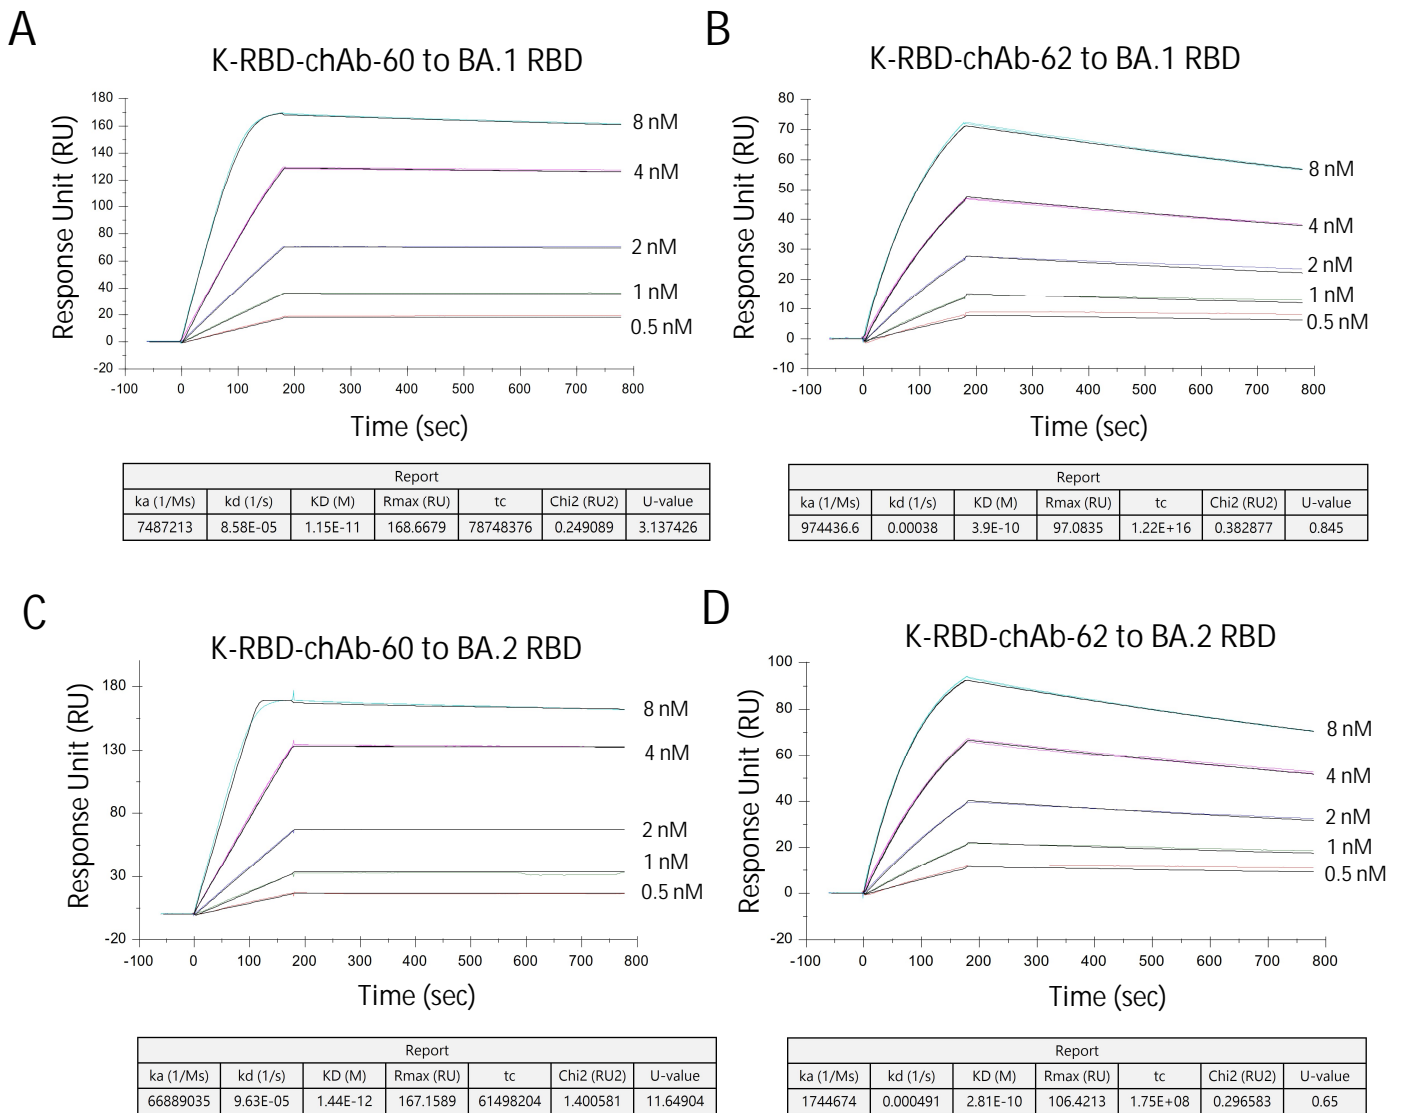

**Figure S2. The binding kinetics of K-RBD-chAbs to recombinant Omicron BA.1 and BA.2 RBD protein.** Analysis of the kinetics of the ligands (K-RBD-chAbs) to the analytes (BA.1 and BA.2 RBD protein) using BIAcore T200 system. Global fitted curves are shown. The KD values were calculated using a 1:1 binding model. Analyte concentration ranged 0.5 to 8 nM.
